# Supplementary material for: Comparative proteomic study of Arabidopsis mutants mpk4 and mpk6
Source: PubMed Central journal article supplement (PMC4915016; doi:10.1038/srep28306), 2016-06-21
Supplement: srep28306-s1.pdf [file srep28306-s1.pdf]

# Supplementary information

## Comparative proteomic study of *Arabidopsis* mutants *mpk4* and *mpk6*

Tomáš Takáč<sup>1</sup>, Pavol Vadovič<sup>1</sup>, Tibor Pechan<sup>2</sup>, Ivan Luptovčiak<sup>1</sup>, Olga Šamajová<sup>1</sup>,  
Jozef Šamaj<sup>1\*</sup>

<sup>1</sup>Centre of the Region Haná for Biotechnological and Agricultural Research,  
Faculty of Science, Palacký University, Šlechtitelů 27, 783 71 Olomouc, Czech  
Republic

<sup>2</sup>Institute for Genomics, Biocomputing & Biotechnology, Mississippi State  
University, MS 39762, USA

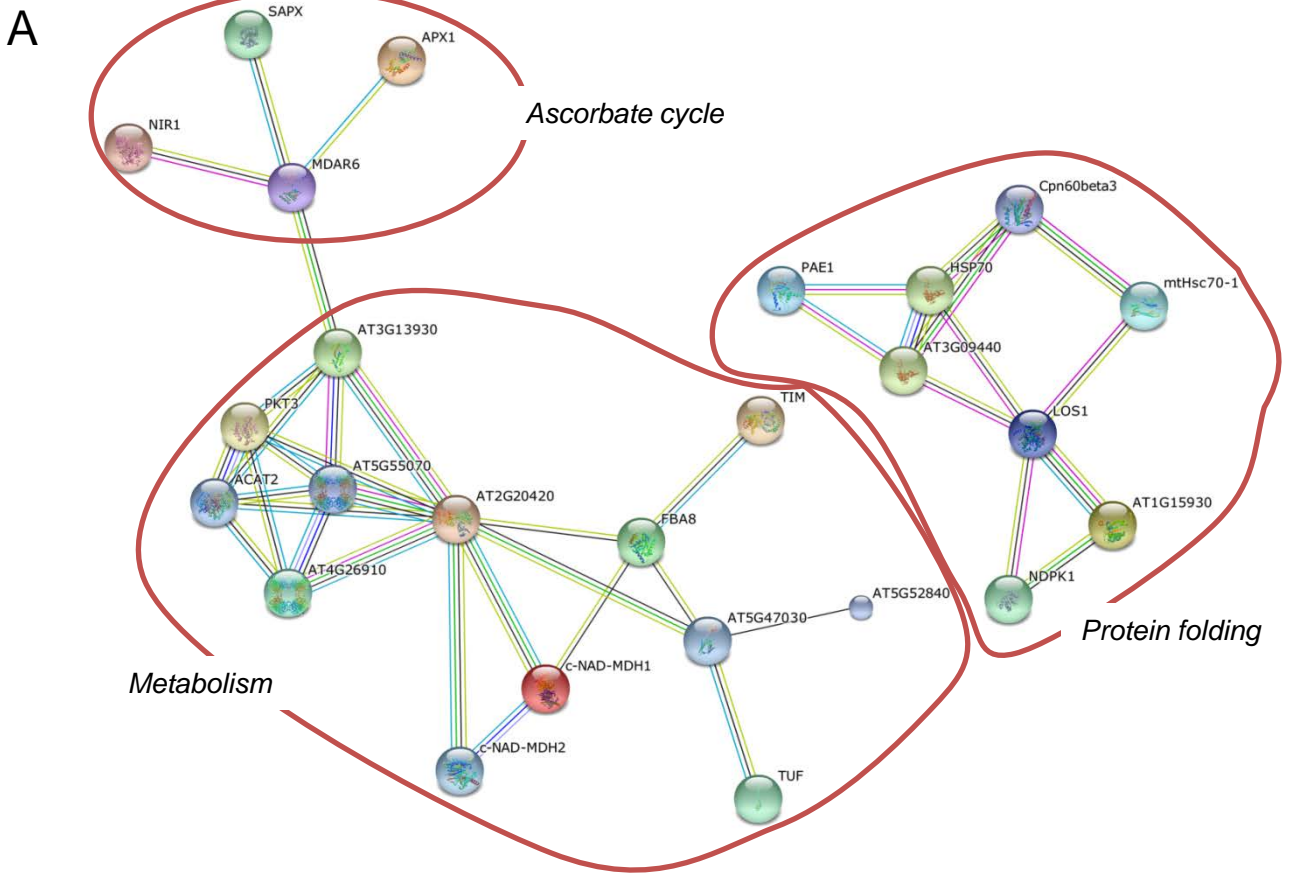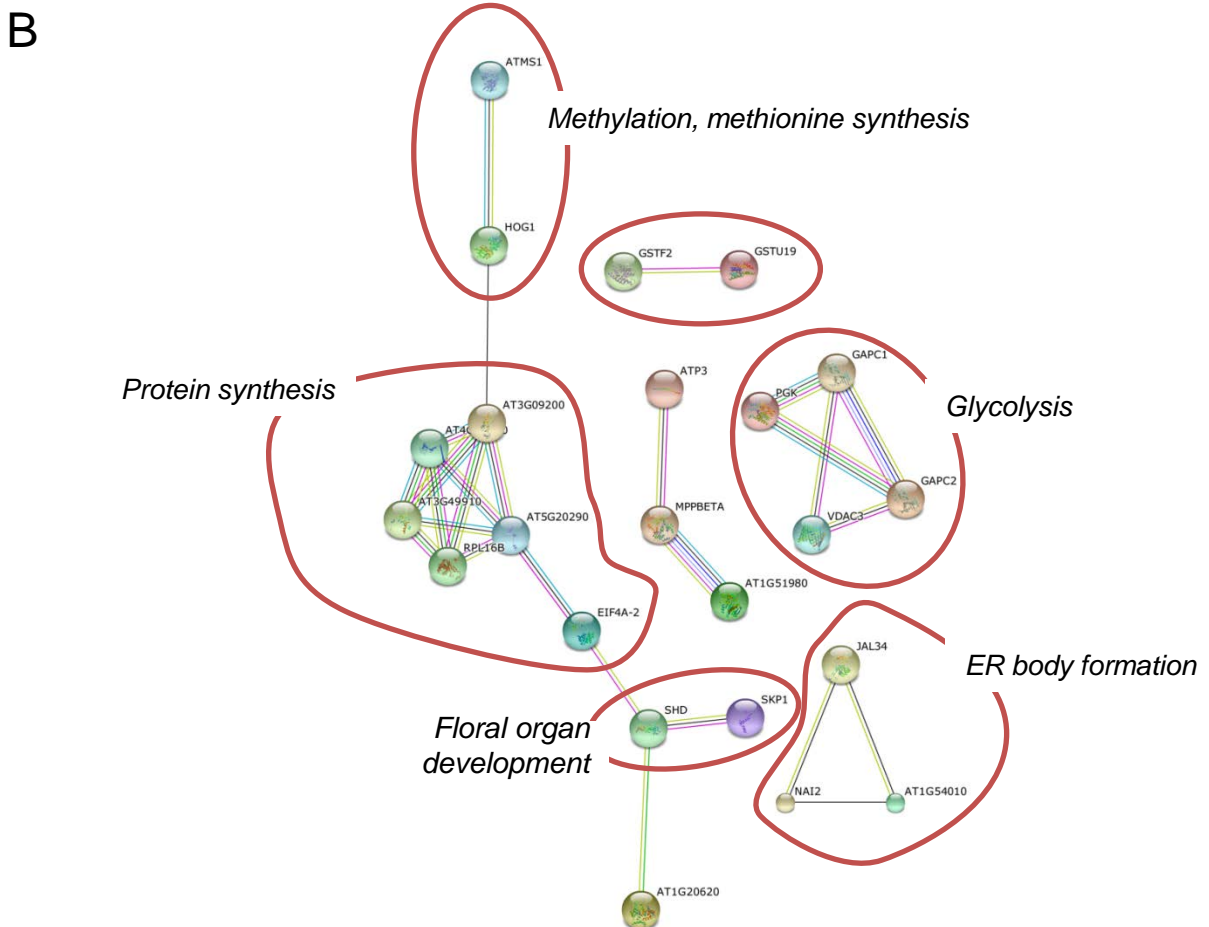

**Figure S1** Interaction networks in *mpk4* mutant differential root proteome as predicted by STRING software for proteins with decreased (A) and increased (B) abundance in the mutant compared to wild type.

A

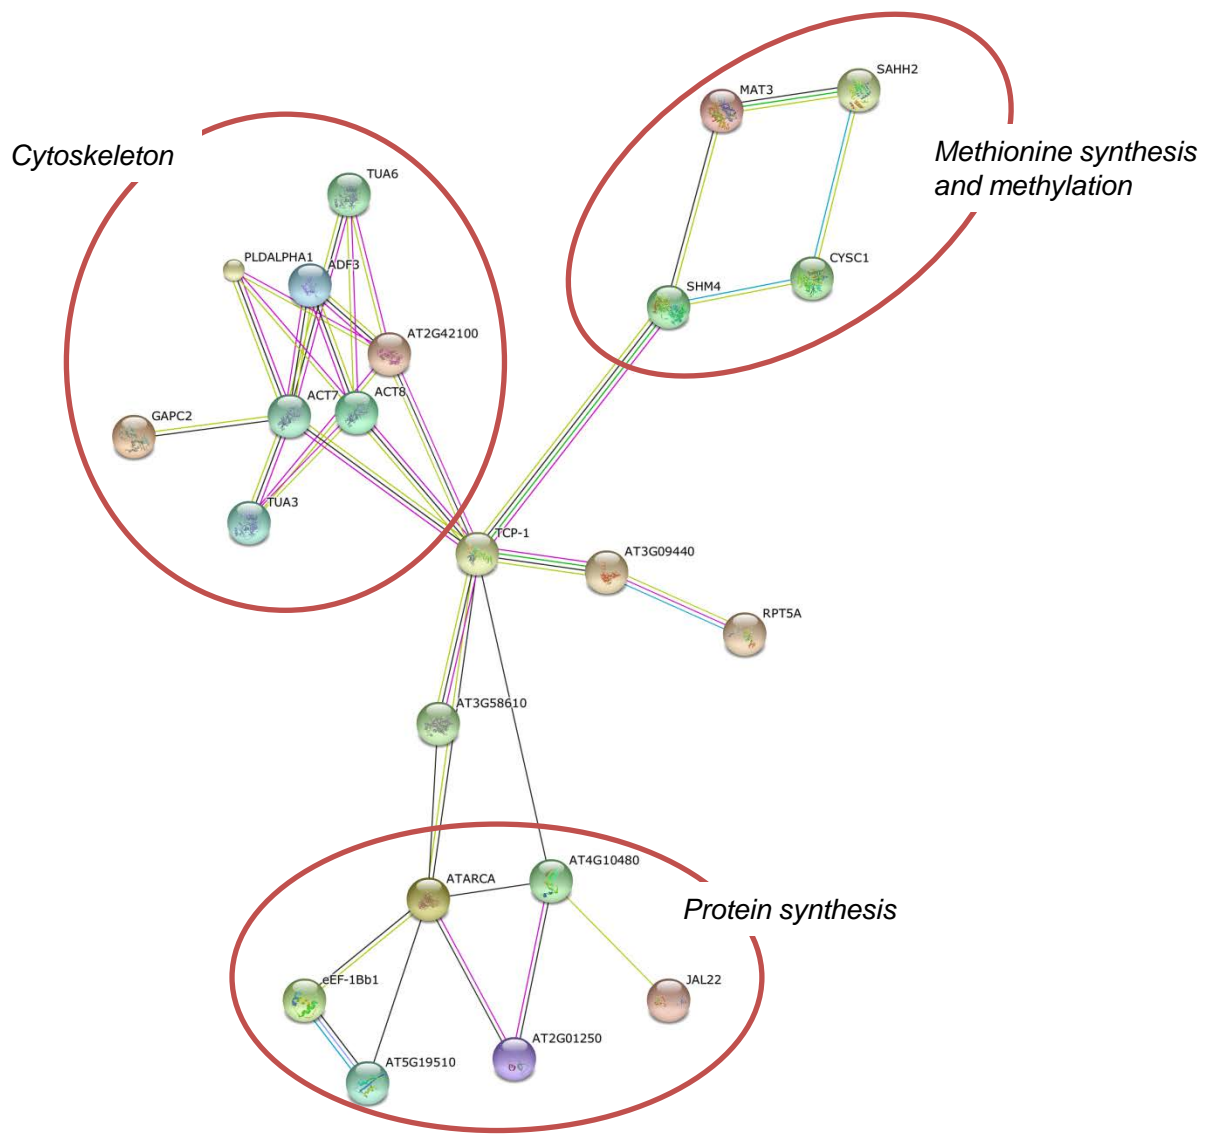

B

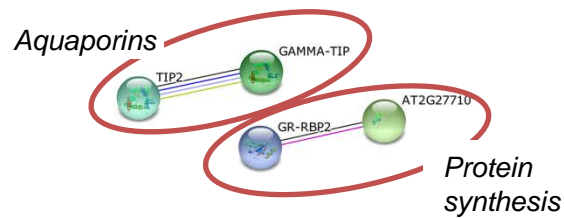

**Figure S2** Interaction networks in *mpk6* mutant differential root proteome as predicted by STRING software for proteins with decreased (A) and increased (B) abundance in the mutant compared to wild type.

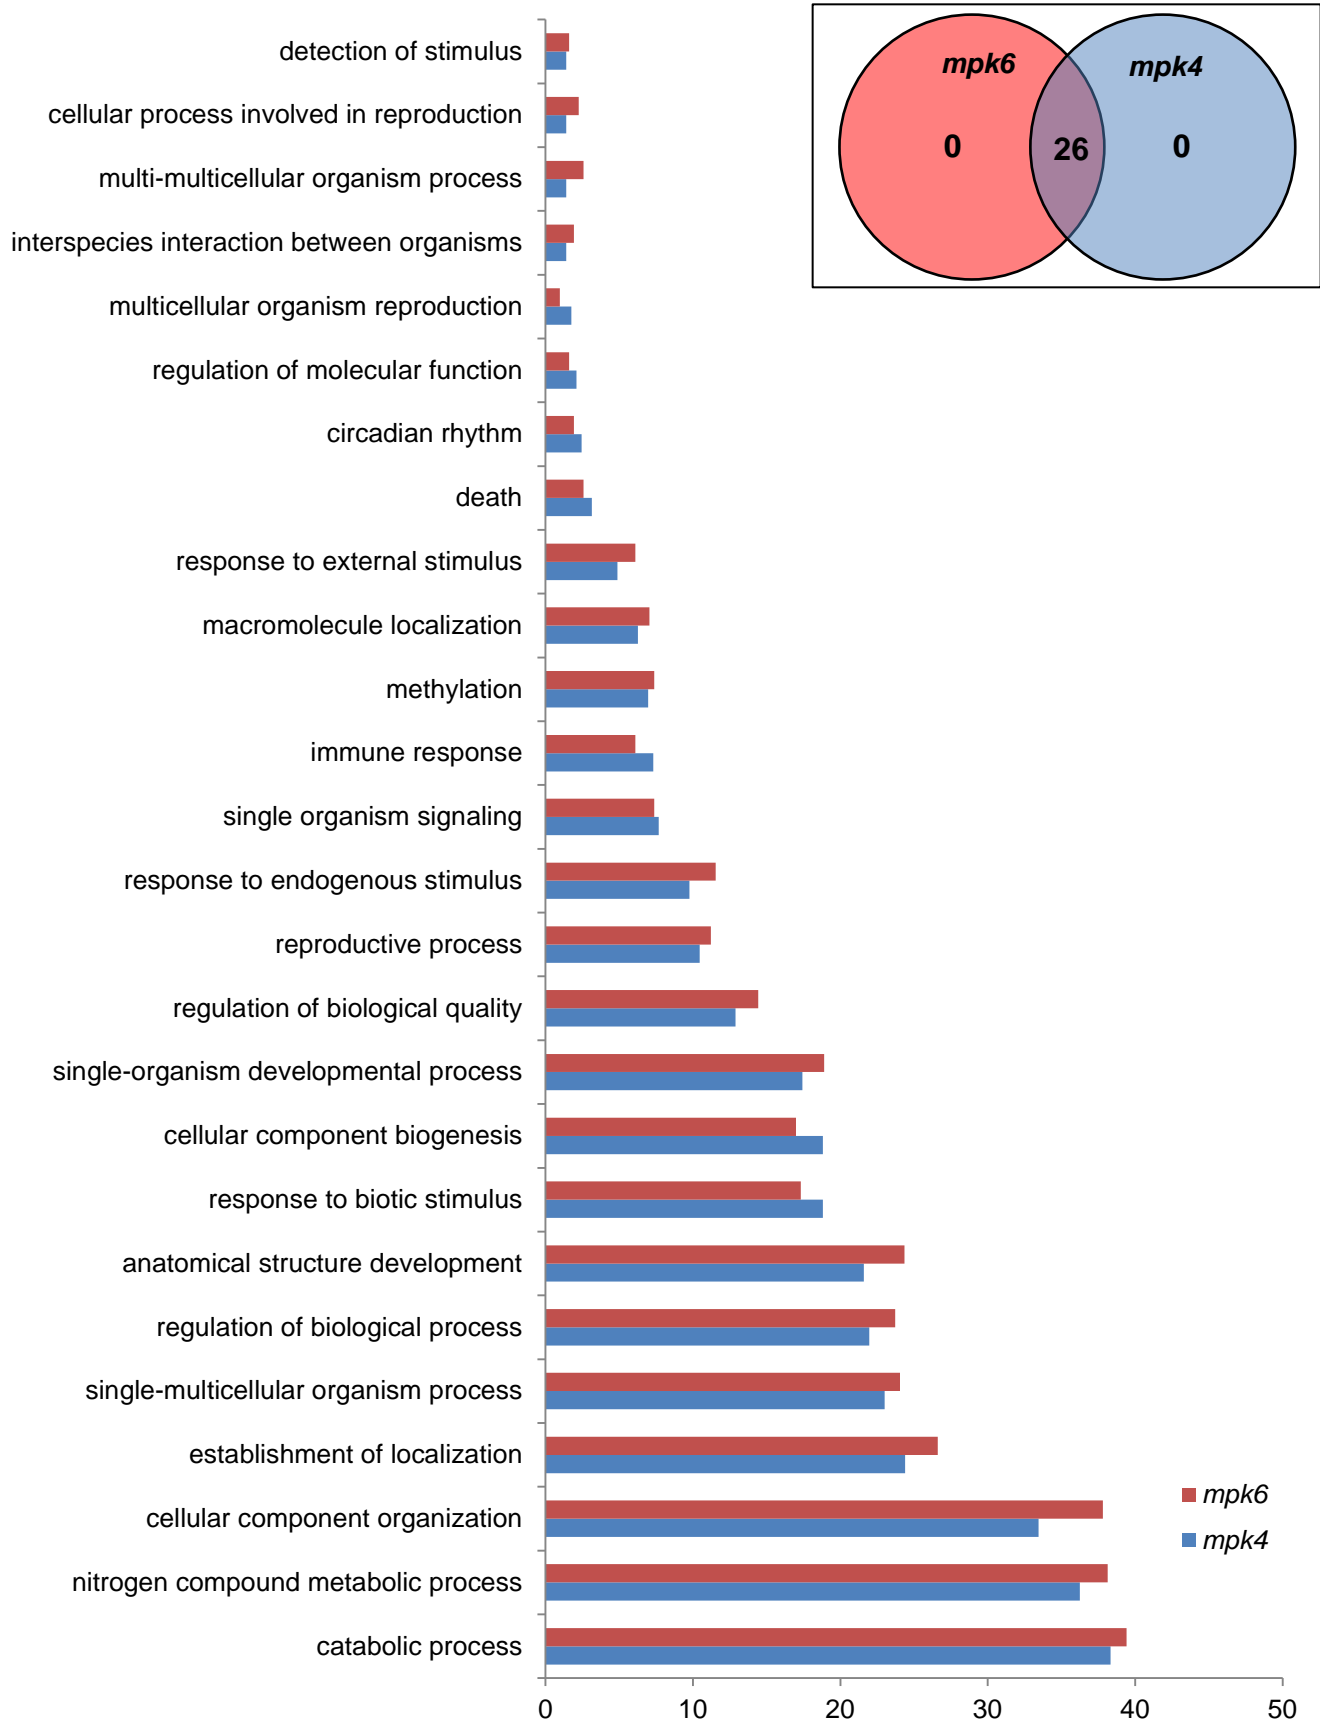

**Figure S3.** Comparison of gene ontology annotations (at 3rd level of ontology) of all proteins identified in *mpk4* and *mpk6* mutant roots according to biological process. Relative protein numbers of proteins per annotation are presented in the graph. Venn diagram shows the number of GO annotations assigned solely to *mpk6* (red field) and *mpk4* mutant root proteome (blue field) as well as the number of GO annotations present in both mutant proteomes (overlap).

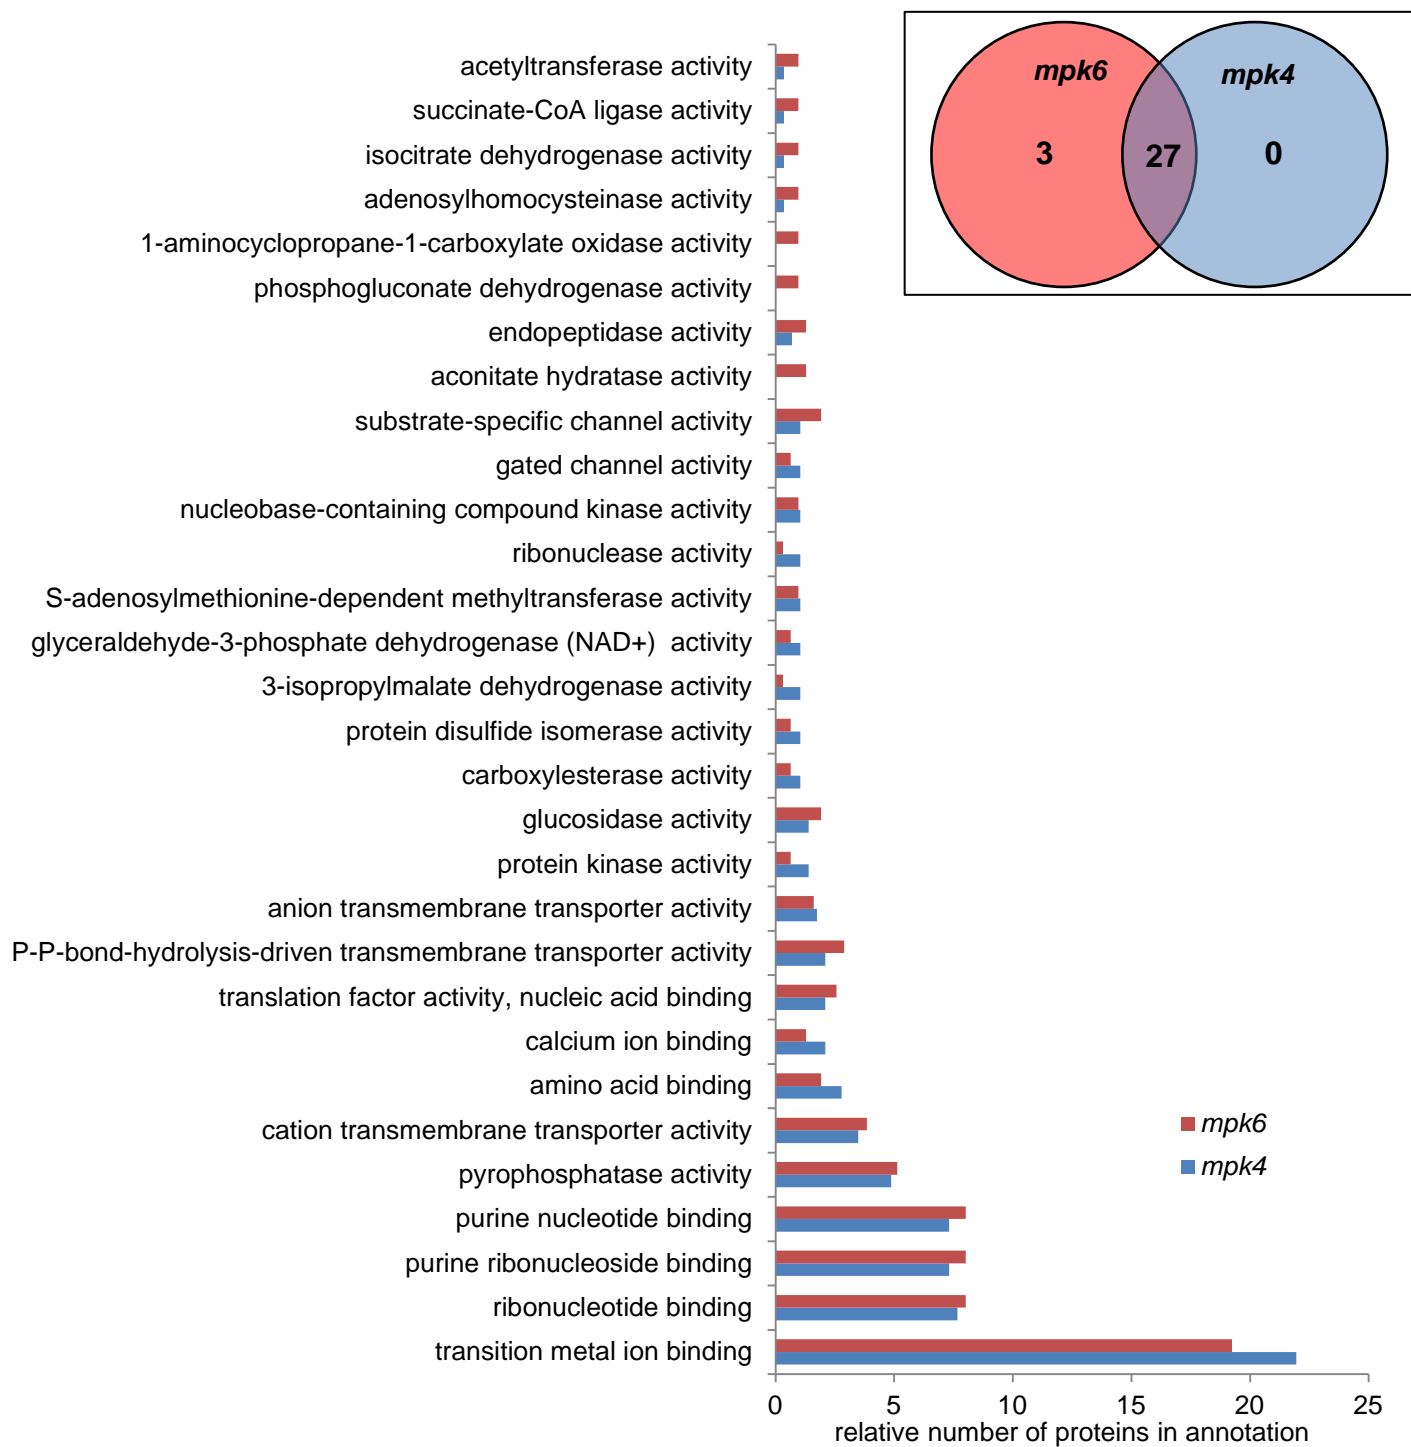

**Figure S4.** Comparison of gene ontology annotations (at 6th level of ontology) of all proteins identified in *mpk4* and *mpk6* mutant roots according to molecular function. Relative protein numbers of proteins per annotation are presented in the graph. Venn diagram shows the number of GO annotations assigned solely to *mpk6* (red field) and *mpk4* mutant root proteome (blue field) as well as the number of GO annotations present in both mutant proteomes (overlap).

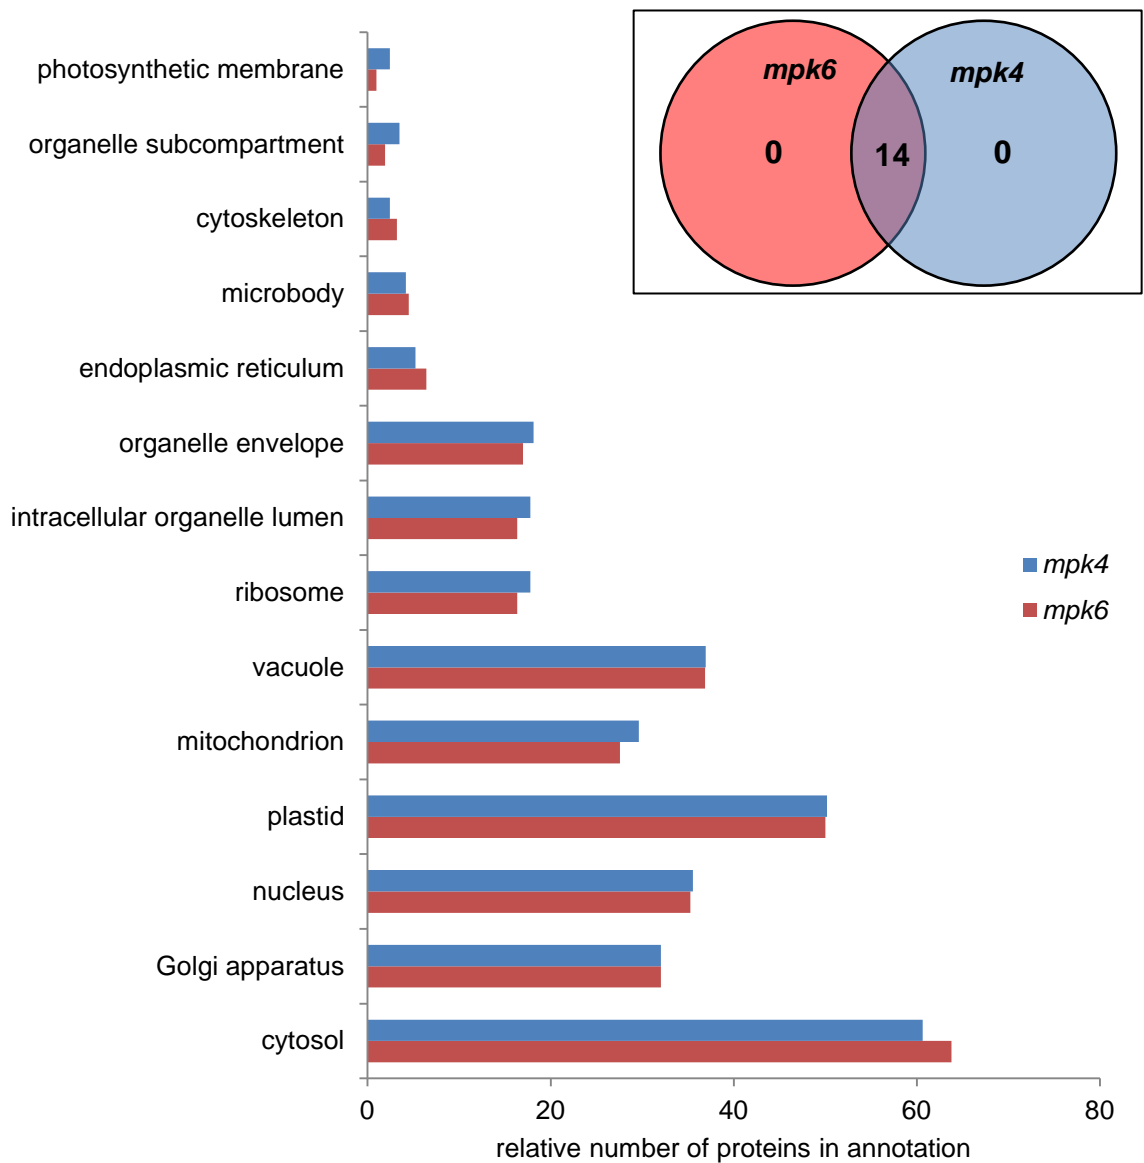

**Figure S5.** Comparison of gene ontology annotations (at 8th level of ontology) of all proteins identified in *mpk4* and *mpk6* mutant roots (in 3 out of 4 biological replicates) according to cellular component. Relative protein numbers of proteins per annotation are presented in the graph. Venn diagram shows the number of GO annotations assigned solely to *mpk6* (red field) and *mpk4* mutant root proteome (blue field) as well as the number of GO annotations present in both mutant proteomes (overlap).

**Table S1.** List of proteins with significantly changed abundance in roots of Arabidopsis *mpk4* mutant seedlings compared to wild type (Col-0). Abundance was calculated from 4 biological replicates. One way Anova analysis was carried out for statistical evaluation of significance.

| Accession                            | Coverage | # Peptides | MW [kDa] | calc. pI | Score  | Description                                        | Intensity sum (average Col0) | Intensity sum (average <i>mpk4</i> ) | P-value | fold         |
|--------------------------------------|----------|------------|----------|----------|--------|----------------------------------------------------|------------------------------|--------------------------------------|---------|--------------|
| <b>DOWNREGULATED</b>                 |          |            |          |          |        |                                                    |                              |                                      |         |              |
| <b>Stress related proteins</b>       |          |            |          |          |        |                                                    |                              |                                      |         |              |
| gi334185401                          | 34.34    | 17         | 32.1     | 5.44     | 82.86  | JA-responsive protein 1                            | 44159838                     | 28287813                             | 0.023   | 0.64         |
| gi18413214                           | 29.59    | 9          | 18.8     | 8.27     | 61.76  | nucleoside diphosphate kinase 1                    | 37876742                     | 23032132                             | 0.045   | 0.61         |
| gi15224648                           | 30       | 6          | 11       | 4.88     | 43.39  | membrane-associated progesterone binding protein 2 | 45080293                     | 16934108                             | 0.001   | 0.38         |
| gi18379240                           | 46.36    | 24         | 17.5     | 5.73     | 142.14 | MLP-like protein 328                               | 133320704                    | 46183710                             | 0.001   | 0.35         |
| gi18379244                           | 49.01    | 23         | 17.6     | 5.55     | 128.66 | MLP-like protein 329                               | 92297424                     | 23811471                             | 0.001   | 0.26         |
| gi334186408                          | 17.5     | 10         | 37.4     | 9.6      | 55.92  | L-ascorbate peroxidase S                           | 16727486                     | 1908328                              | 0.022   | 0.11         |
| gi30696930                           | 21.37    | 18         | 52.1     | 7.75     | 122.47 | Monodehydroascorbate reductase                     | 45865373                     | 10864237                             | 0.001   | 0.24         |
| gi30686836                           | 25.1     | 17         | 29.4     | 5.47     | 75.07  | dehydrin ERD10                                     | 24023126                     | 7804980                              | 0.02    | 0.32         |
| gi30690396                           | 31.25    | 41         | 38.8     | 6.67     | 258.53 | Peroxidase family protein                          | 168956530                    | 70979878                             | 0.016   | 0.42         |
| gi30690772                           | 34.22    | 29         | 29.2     | 8.5      | 153.92 | glutathione S-transferase phi 8                    | 99466734                     | 49415219                             | 0.001   | 0.5          |
| gi145323784                          | 45.78    | 34         | 27.5     | 6.29     | 181.81 | L-ascorbate peroxidase 1                           | 78213410                     | 18975297                             | 0.041   | 0.24         |
| gi15237716                           | 13.42    | 5          | 33.8     | 6.1      | 30.87  | TOMV RNA binding protein                           | 12474685                     | 2640969                              | 0.001   | 0.21         |
| gi15232058                           | 13.4     | 6          | 34.9     | 8.95     | 25.84  | peroxidase 27                                      | 4017186                      | -                                    | -       | unique in WT |
| gi18401423                           | 11.93    | 1          | 12.2     | 5.68     | 14     | heat stable protein 1                              | 2733535                      | -                                    | -       | unique in WT |
| gi145334501                          | 5.84     | 1          | 27       | 5.63     | 22.57  | binding partner of acd11 1                         | 4012129                      | -                                    | -       | unique in WT |
| <b>Protein synthesis and folding</b> |          |            |          |          |        |                                                    |                              |                                      |         |              |
| gi334188446                          | 16.92    | 18         | 63.3     | 5.87     | 104.79 | TCP-1/cpn60 chaperonin family protein              | 44038838                     | 10240942                             | 0.007   | 0.23         |
| gi15230534                           | 23.54    | 34         | 71.1     | 5.25     | 208.69 | heat shock protein 70-4                            | 113395522                    | -                                    | -       | unique in WT |
| gi334185190                          | 26.81    | 44         | 71.1     | 5.7      | 229.3  | heat shock protein 70-3                            | 144132985                    | 82821161                             | 0.008   | 0.57         |
| gi240255880                          | 53.49    | 11         | 9.3      | 4.48     | 61.9   | heat shock factor binding protein                  | 21432992                     | -                                    | -       | unique in WT |
| gi30691626                           | 14.37    | 19         | 73       | 5.62     | 147.99 | heat shock protein 70-1                            | 37202366                     | 11969206                             | 0.015   | 0.32         |
| gi15236211                           | 43.02    | 19         | 18.4     | 8.69     | 168.3  | rotamase cyclophilin 5                             | 99205263                     | 49647915                             | 0.004   | 0.5          |
| gi30684617                           | 29.17    | 11         | 15.4     | 5.55     | 64.37  | 40S ribosomal protein S12-1                        | 31597439                     | 4316075                              | 0.004   | 0.14         |
| gi15234781                           | 60.47    | 19         | 18.4     | 7.81     | 130.6  | peptidyl-prolyl cis-trans isomerase CYP1           | 84563207                     | 45953462                             | 0.005   | 0.54         |
| gi30696056                           | 14       | 25         | 93.8     | 6.25     | 161.39 | elongation factor EF-2                             | 36188952                     | 2767139                              | 0.001   | 0.08         |
| <b>Vesicular trafficking</b>         |          |            |          |          |        |                                                    |                              |                                      |         |              |
| gi15237054                           | 30.87    | 19         | 26       | 6.4      | 176.65 | V-type proton ATPase subunit E1                    | 579193317                    | 6277232                              | 0.015   | 0.11         |
| <b>Cytoskeletal proteins</b>         |          |            |          |          |        |                                                    |                              |                                      |         |              |
| gi15233538                           | 43.51    | 15         | 14       | 5.2      | 73     | profilin 2                                         | 49367881                     | 12542005                             | 0.004   | 0.25         |
| gi15224838                           | 43.51    | 11         | 14.3     | 4.82     | 72.27  | profilin 1                                         | 28135567                     | 10004823                             | 0.020   | 0.36         |
| <b>Metabolism</b>                    |          |            |          |          |        |                                                    |                              |                                      |         |              |
| gi79558700                           | 17.16    | 6          | 19       | 6.79     | 32.4   | rhodanese-like domain-containing protein           | 8990279                      | -                                    | -       | unique in WT |

|                              |       |    |       |      |        |                                                                                                     |             |             |       |              |
|------------------------------|-------|----|-------|------|--------|-----------------------------------------------------------------------------------------------------|-------------|-------------|-------|--------------|
| gi334186360                  | 25.58 | 4  | 14    | 5.26 | 22.15  | peptide methionine sulfoxide reductase B5                                                           | 7918550     | -           | -     | unique in WT |
| gi30695409                   | 4.27  | 1  | 40.9  | 6.5  | 23.45  | acetoacetyl-CoA thiolase 2                                                                          | 4097356     | -           | -     | unique in WT |
| gi18423437                   | 8.88  | 1  | 19.2  | 4.77 | 3.67   | probable NADH dehydrogenase [ubiquinone] 1 alpha subcomplex subunit 5                               | 14759169    | 3307172     | 0.018 | 0.22         |
| gi15225353                   | 8.31  | 7  | 45.3  | 6.71 | 88.83  | Succinyl-CoA ligase [GDP-forming] subunit beta                                                      | 24356937    | 8969895     | 0.021 | 0.37         |
| gi15219721                   | 38.86 | 32 | 35.5  | 6.55 | 225.34 | malate dehydrogenase                                                                                | 146565660   | 60763875    | 0.016 | 0.41         |
| gi238479568                  | 9.82  | 3  | 18.5  | 4.78 | 16.32  | thiocyanate methyltransferase 1                                                                     | 6653891     | 2836376     | 0.017 | 0.43         |
| gi145329204                  | 22.88 | 13 | 32.3  | 7.49 | 75.34  | triosephosphate isomerase                                                                           | 26467098    | 11954894    | 0.041 | 0.45         |
| gi15225798                   | 24.68 | 14 | 48.5  | 8.34 | 87.2   | 3-ketoacyl-CoA thiolase 2                                                                           | 22599512    | 10566258    | 0.028 | 0.47         |
| gi15219886                   | 15.18 | 10 | 21.2  | 4.34 | 45.56  | cytochrome C oxidase 6B                                                                             | 27322231    | 14556289    | 0.009 | 0.53         |
| gi15236568                   | 14.57 | 8  | 17.5  | 6.34 | 43.47  | polyketide cyclase/dehydrase and lipid transport superfamily protein                                | 38732855    | 10718416    | 0.018 | 0.28         |
| gi79313339                   | 20.76 | 5  | 25.5  | 5.2  | 26.99  | alpha/beta-Hydrolases superfamily protein                                                           | 8443513     | 2694350     | 0.024 | 0.32         |
| gi186502696                  | 24.42 | 27 | 54.5  | 5.92 | 129.1  | aminopeptidase family protein                                                                       | 39638087    | 24594163    | 0.035 | 0.62         |
| gi30687411                   | 16.99 | 5  | 39.7  | 7.53 | 44.11  | Dihydrolipoamide succinyltransferase                                                                | 9641136     | -           | -     | unique in WT |
| gi18400212                   | 4.45  | 2  | 58.4  | 7.65 | 31.36  | dihydrolipoamide acetyltransferase, long form protein                                               | 11109967    | -           | -     | unique in WT |
| gi15240454                   | 3.66  | 4  | 50.1  | 9.14 | 25.37  | dihydrolipoyllysine-residue succinyltransferase component of 2-oxoglutarate dehydrogenase complex 1 | 728437      | -           | -     | unique in WT |
| gi15239843                   | 24.7  | 21 | 35.7  | 6.79 | 146.81 | malate dehydrogenase                                                                                | 94027894    | -           | -     | unique in WT |
| gi15237998                   | 7.88  | 4  | 21.5  | 6.7  | 22.47  | ATP synthase subunit delta'                                                                         | 6292429     | -           | -     | unique in WT |
| gi15237679                   | 14.29 | 5  | 12    | 6.4  | 32.07  | peptidyl-prolyl isomerase FKBP12                                                                    | 7765998     | -           | -     | unique in WT |
| gi15233349                   | 6.46  | 13 | 98.1  | 6.4  | 78.55  | aconitate hydratase 1                                                                               | 7324322     | -           | -     | unique in WT |
| gi15226573                   | 4.78  | 7  | 65.5  | 6.28 | 43.64  | Ferredoxin--nitrite reductase                                                                       | 3798383     | -           | -     | unique in WT |
| gi15231715                   | 50.56 | 43 | 38.5  | 6.46 | 272.67 | fructose-bisphosphate aldolase                                                                      | 166335365.1 | 117852344.5 | 0.025 | 0.71         |
| <b>Signaling</b>             |       |    |       |      |        |                                                                                                     |             |             |       |              |
| gi18417863                   | 13.6  | 5  | 30.2  | 4.81 | 36.66  | 14-3-3-like protein GF14 upsilon                                                                    | 3761124     | -           | -     | unique in WT |
| <b>Proteolysis</b>           |       |    |       |      |        |                                                                                                     |             |             |       |              |
| gi22331076                   | 6.44  | 2  | 81.8  | 6.77 | 30.68  | Subtilase family protein                                                                            | 3949056     | -           | -     | unique in WT |
| gi15220874                   | 27.55 | 13 | 22.1  | 8.78 | 63.97  | kunitz type trypsin and protease inhibitor domain-containing protein                                | 13269998    | -           | -     | unique in WT |
| gi145325425                  | 20.25 | 6  | 25.9  | 4.75 | 59.01  | proteasome subunit alpha type-5-A                                                                   | 6712319     | 2157322     | 0.023 | 0.32         |
| gi15219345                   | 16.27 | 9  | 45.5  | 4.82 | 59.27  | metacaspase 4                                                                                       | 14305198    | -           | -     | unique in WT |
| <b>Unknown function</b>      |       |    |       |      |        |                                                                                                     |             |             |       |              |
| gi240254562                  | 3     | 6  | 148.5 | 4.75 | 81.64  | uncharacterized protein                                                                             | 12034279    | -           | -     | unique in WT |
| gi18402503                   | 33.54 | 4  | 16.9  | 5.3  | 33.78  | uncharacterized protein                                                                             | 4479077     | -           | -     | unique in WT |
| <b>Cell wall composition</b> |       |    |       |      |        |                                                                                                     |             |             |       |              |
| gi145324054                  | 6.3   | 5  | 33.9  | 10.7 | 42.42  | arabinogalactan protein 31                                                                          | 5011771     | -           | -     | unique in WT |
| <b>Translation</b>           |       |    |       |      |        |                                                                                                     |             |             |       |              |
| gi30682607                   | 1.6   | 3  | 141.9 | 6.6  | 25.44  | mRNA decapping complex VCS                                                                          | 122872      | -           | -     | unique in WT |
| <b>Scaffolding protein</b>   |       |    |       |      |        |                                                                                                     |             |             |       |              |
| gi15225899                   | 13.68 | 3  | 21    | 8.54 | 18.85  | Remorin family protein                                                                              | 7158948     | -           | -     | unique in WT |



**UPREGULATED**

| <b>Metabolism</b>                                |       |    |      |       |        |                                                                       |           |           |       |                       |
|--------------------------------------------------|-------|----|------|-------|--------|-----------------------------------------------------------------------|-----------|-----------|-------|-----------------------|
| gi15227257                                       | 22.46 | 10 | 35.4 | 8.9   | 81.77  | ATP synthase subunit gamma                                            | 3880740   | 18269069  | 0.002 | 4.71                  |
| gi15218090                                       | 16.1  | 8  | 54.4 | 6.33  | 80.45  | putative mitochondrial-processing peptidase subunit alpha-1           | 3945991   | 51746913  | 0.038 | 2.31                  |
| gi15240765                                       | 16.67 | 5  | 29.6 | 8.85  | 64.56  | voltage dependent anion channel 2                                     | 4835579   | 11676030  | 0.005 | 2.41                  |
| gi79587736                                       | 18.2  | 10 | 31.9 | 5.27  | 55.37  | glyoxalase I homolog                                                  | 5433689   | 38446250  | 0.001 | 7.08                  |
| gi79327847                                       | 31.7  | 26 | 41.9 | 6     | 125.33 | isopropylmalate dehydrogenase 1                                       | 21088922  | 50750377  | 0.007 | 2.41                  |
| gi15229231                                       | 50    | 55 | 36.9 | 7.12  | 308.86 | glyceraldehyde-3-phosphate dehydrogenase C subunit 1                  | 141154062 | 370726048 | 0.004 | 2.63                  |
| gi145334507                                      | 23.1  | 57 | 84.3 | 6.51  | 317.79 | 5-methyltetrahydropteroyltriglutamate--homocysteine methyltransferase | 43824674  | 120126136 | 0.025 | 2.74                  |
| gi15235213                                       | 24.71 | 13 | 29.1 | 5.29  | 89.73  | putative coffeoyl-CoA O-methyltransferase                             | 16286350  | 37972542  | 0.027 | 2.33                  |
| gi30699430                                       | 34.66 | 27 | 42.1 | 5.68  | 203.37 | phosphoglycerate kinase                                               | 83143041  | 131826906 | 0.016 | 1.59                  |
| <b>Nucleic acid binding</b>                      |       |    |      |       |        |                                                                       |           |           |       |                       |
| gi79313257                                       | 25.2  | 24 | 80.7 | 4.7   | 221.13 | DNA topoisomerase-like protein                                        | 44648919  | 74541493  | 0.001 | 1.67                  |
| gi15239697                                       | 24.62 | 8  | 13.6 | 10.15 | 39.65  | histone H2A                                                           | 8672749   | 19871188  | 0.021 | 2.29                  |
| <b>Stress related</b>                            |       |    |      |       |        |                                                                       |           |           |       |                       |
| gi15220216                                       | 34.7  | 20 | 36.2 | 5.38  | 159.85 | annexin 1                                                             | 18417212  | 81194961  | 0.013 | 4.41                  |
| gi240255920                                      | 34.3  | 23 | 37.7 | 6.84  | 144.83 | putative beta-1,3-endoglucanase                                       | 14524276  | 86520500  | 0.004 | 5.96                  |
| gi18414298                                       | 22.7  | 13 | 47.5 | 5.31  | 107.75 | monodehydroascorbate reductase (NADH)                                 | 9202420   | 56147858  | 0.046 | 6.1                   |
| gi15235401                                       | 38.21 | 23 | 24.1 | 6.35  | 146.9  | glutathione S-transferase F2                                          | 41864796  | 118071075 | 0.021 | 2.82                  |
| gi18411929                                       | 12.79 | 2  | 25.6 | 6.4   | 65.94  | glutathione S-transferase TAU 19                                      | 4073923   | 12470006  | 0.013 | 3.06                  |
| gi79607896                                       | 31.91 | 60 | 72.4 | 5.5   | 368.81 | jacalin-like lectin domain-containing protein                         | 102024107 | 373005179 | 0.001 | 3.66                  |
| <b>Protein synthesis, processing and folding</b> |       |    |      |       |        |                                                                       |           |           |       |                       |
| gi15236981                                       | 17.91 | 2  | 15.5 | 10.4  | 28.17  | 60S ribosomal protein L14-2                                           | 4460163   | 32625377  | 0.001 | 7.31                  |
| gi30694819                                       | 13.95 | 4  | 19.8 | 9.92  | 34.55  | 60S ribosomal protein L11-2                                           | 2227646   | 21059651  | 0.005 | 9.45                  |
| gi145332383                                      | 13.43 | 6  | 45.7 | 6.28  | 42.16  | translational initiation factor 4A-1                                  | 5401363   | 15502069  | 0.043 | 2.87                  |
| gi18410311                                       | 12.56 | 6  | 23.8 | 7.18  | 59.49  | kunitz trypsin inhibitor 1                                            | 3790257   | 13873594  | 0.001 | 3.66                  |
| gi15232603                                       | 25    | 14 | 34.1 | 5.7   | 104.3  | 60S acidic ribosomal protein P0-2                                     | 3050007   | 14057122  | 0.044 | 4.61                  |
| gi15233740                                       | 15.67 | 20 | 94.1 | 5.3   | 141.95 | HSP90-like protein GRP94                                              | 9673127   | 48278582  | 0.000 | 4.99                  |
| gi15233268                                       | 34    | 13 | 27.5 | 7.11  | 64.98  | 20S proteasome alpha-3 subunit                                        | 2774847   | 15100795  | 0.012 | 5.44                  |
| <b>Lipid metabolism</b>                          |       |    |      |       |        |                                                                       |           |           |       |                       |
| gi18404748                                       | 28.76 | 26 | 43.1 | 8.7   | 164.62 | GDSL esterase/lipase                                                  | 18672028  | 102368760 | 0.005 | 5.48                  |
| gi15232845                                       | 25.42 | 28 | 59.1 | 6.79  | 183.49 | probable mitochondrial-processing peptidase subunit beta              | 3945991   | 51746913  | 0.001 | 13.11                 |
| <b>AminoAcid metabolism</b>                      |       |    |      |       |        |                                                                       |           |           |       |                       |
| gi186513287                                      | 3.78  | 3  | 49   | 7.72  | 18.56  | argininosuccinate synthase                                            | 1422378   | 5166958   | 0.041 | 3.63                  |
| gi145333043                                      | 14.77 | 10 | 35.5 | 5.16  | 61     | adenosylhomocysteinase                                                | 892125    | 22523603  | 0.015 | 25.25                 |
| <b>Unknown</b>                                   |       |    |      |       |        |                                                                       |           |           |       |                       |
| gi15229809                                       | 5.88  | 8  | 21.6 | 9.41  | 26.53  | uncharacterized protein                                               | 10940894  | 28197085  | 0.047 | 2.58                  |
| gi22328599                                       | 18.39 | 3  | 9.5  | 4.97  | 24.38  | RNA recognition motif-containing protein                              |           | 4138353   |       | unique in <i>mpk4</i> |
| gi186478702                                      | 3.71  | 3  | 43.9 | 7.61  | 17.48  | catalase 3                                                            | -         | 9288542   | -     | unique in <i>mpk4</i> |

|            |       |    |      |       |        |                                        |   |          |   |                       |
|------------|-------|----|------|-------|--------|----------------------------------------|---|----------|---|-----------------------|
| gi18421006 | 30.77 | 19 | 39.8 | 9.22  | 106.73 | TRAF-like family protein               | - | 77036438 | - | unique in <i>mpk4</i> |
| gi18410982 | 9.38  | 4  | 17.8 | 4.54  | 18.16  | S-phase kinase-associated protein 1    | - | 2756551  | - | unique in <i>mpk4</i> |
| gi18406229 | 13.89 | 15 | 45   | 5.82  | 76.81  | TRAF-like protein                      | - | 2756551  | - | unique in <i>mpk4</i> |
| gi15241316 | 33.78 | 17 | 25   | 10.32 | 87.57  | 40S ribosomal protein S8-1             | - | 55838806 | - | unique in <i>mpk4</i> |
| gi15229631 | 15.7  | 3  | 16.9 | 10.78 | 36.15  | 60S ribosomal protein L26-1            | - | 16600695 | - | unique in <i>mpk4</i> |
| gi15226503 | 6.61  | 3  | 26.9 | 7.2   | 16.1   | short-chain dehydrogenase reductase 3a | - | 8057351  | - | unique in <i>mpk4</i> |

**Table S2.** List of proteins with significantly changed abundance in roots of *Arabidopsis mpk6* mutant seedlings compared to wild type (Col-0). Abundance was calculated from 4 biological replicates. One way Anova analysis was carried out for statistical evaluation of significance.

| Accession                            | Coverage | # Peptides | MW [kDa] | calc. pI | Score  | Description                                              | Intensity sum (average Col0) | Intensity sum (average <i>mpk6</i> ) | Fold change | <i>P</i> value        |
|--------------------------------------|----------|------------|----------|----------|--------|----------------------------------------------------------|------------------------------|--------------------------------------|-------------|-----------------------|
| <b>DOWNREGULATED</b>                 |          |            |          |          |        |                                                          |                              |                                      |             |                       |
| <b>Stress related proteins</b>       |          |            |          |          |        |                                                          |                              |                                      |             |                       |
| gi15228041                           | 35.3     | 4          | 41.8     | 6.51     | 47.67  | aquaporin TIP1-1                                         | 12761819                     | 672496                               | 0.05        | 1.02E-05              |
| gi15231569                           | 32.38    | 7          | 41.8     | 5.6      | 42.67  | aquaporin TIP1-2                                         | 10500652                     | 813310                               | 0.08        | 0.005                 |
| gi18414298                           | 29.49    | 8          | 47.5     | 4.97     | 56.54  | monodehydroascorbate reductase (NADH)                    | 55562447                     | 1493058                              | 0.03        | 0.01                  |
| <b>Cytoskeletal proteins</b>         |          |            |          |          |        |                                                          |                              |                                      |             |                       |
| gi15233538                           | 41.66    | 7          | 14       | 5.2      | 46.79  | profilin 2                                               | 94136176                     | 19684596                             | 0.21        | 0.049                 |
| <b>Metabolism</b>                    |          |            |          |          |        |                                                          |                              |                                      |             |                       |
| gi15220770                           | 41.79    | 1          | 36.2     | 5.12     | 44.348 | 1-aminocyclopropane-1-carboxylate oxidase 2              | 4871669                      | 462263                               | 0.09        | 0.032                 |
| gi15221156                           | 32.66    | 5          | 61.4     | 6.1      | 49.41  | pyrophosphate--fructose-6-phosphate 1-phosphotransferase | 31023724                     | 2581092                              | 0.08        | 0.01                  |
| gi15240628                           | 41.86    | 2          | 41.72    | 9.86     | 40.65  | delta subunit of Mt ATP synthase                         | 39349332                     | 8045791                              | 0.2         | 0.03                  |
| gi15241592                           | 30.25    | 10         | 36.1     | 8.39     | 70.64  | Succinyl-CoA ligase [GDP-forming] subunit alpha-1        | 85150756                     | 18785954                             | 0.22        | 0.01                  |
| gi18403295                           | 41.8     | 8          | 55.2     | 8.43     | 61.33  | gamma-aminobutyrate transaminase POP2                    | 32812295                     | 4583895                              | 0.14        | 0.015                 |
| <b>Protein synthesis and folding</b> |          |            |          |          |        |                                                          |                              |                                      |             |                       |
| gi30691988                           | 41.73    | 1          | 37.7     | 8.18     | 41426  | chaperone protein dnaJ 3                                 | 31023724                     | 2581092                              | 0.14        | 0.022                 |
| gi15226231                           | 48.7     | 15         | 41.7     | 4.61     | 86.42  | 60S acidic ribosomal protein P2-1                        | 142985326                    | 58068438                             | 0.41        | 0.021                 |
| gi15240317                           | 41.95    | 6          | 60.3     | 5.47     | 56.61  | TCP-1/cpn60 chaperonin family protein                    | 7454995                      | 1014447                              | 0.14        | 0.03                  |
| gi18394184                           | 27.55    | 5          | 41.86    | 7.69     | 45.84  | chaperonin 10                                            | 150262741                    | 13474315                             | 0.09        | 0.01                  |
| <b>Cell Wall proteins</b>            |          |            |          |          |        |                                                          |                              |                                      |             |                       |
| gi145324054                          | 45.87    | 8          | 33.9     | 10.7     | 53.18  | arabinogalactan protein 31                               | 38160494                     | 24382141                             | 0.64        | 0.03                  |
| <b>Nucleic acid binding</b>          |          |            |          |          |        |                                                          |                              |                                      |             |                       |
| gi15239697                           | 40       | 6          | 41803    | 4.22     | 37.45  | histone H2A                                              | 45987241                     | 19931344                             | 0.43        | 0.02                  |
| gi145333041                          | 22.48    | 5          | 41.7     | 6.55     | 41.877 | glycine-rich RNA-binding protein 2                       | 82983541                     | 11330246                             | 0.14        | 0.029                 |
| <b>UPREGULATED</b>                   |          |            |          |          |        |                                                          |                              |                                      |             |                       |
| <b>Stress response</b>               |          |            |          |          |        |                                                          |                              |                                      |             |                       |
| gi334185190                          | 24.35    | 22         | 71.1     | 5.7      | 202.97 | heat shock protein 70-3                                  | 72663041                     | 229242810                            | 3.15        | 0.047                 |
| gi15219623                           | 18.32    | 22         | 59.7     | 7.21     | 162.51 | beta-glucosidase 22                                      | 21211934                     | 241821111                            | 11.4        | 0.017                 |
| gi145334555                          | 18.65    | 8          | 36.9     | 8.18     | 66.61  | TRAF-like family protein                                 | 28420192                     | 72189838                             | 2.54        | 0.029                 |
| gi18421006                           | 20.51    | 7          | 39.8     | 9.62     | 49.14  | TRAF-like family protein                                 | -                            | 45109989                             | -           | unique in <i>mpk6</i> |
| gi15233320                           | 13.6     | 1          | 25       | 5.42     | 34.18  | aquaporin TIP2-1                                         | -                            | 291261                               | -           | unique in <i>mpk6</i> |
| gi238479502                          | 46296    | 4          | 50.4     | 4.93     | 38.64  | jacalin-related lectin 22                                | -                            | 21204913                             | -           | unique in <i>mpk6</i> |
| <b>Protein synthesis and folding</b> |          |            |          |          |        |                                                          |                              |                                      |             |                       |
| gi30687350                           | 42.6     | 9          | 41.6     | 4.56     | 44.45  | Elongation factor 1-beta 2                               | 35745455                     | 86882077                             | 2.43        | 0.007                 |
| gi145332383                          | 34.08    | 15         | 45.7     | 6.28     | 99.12  | translational initiation factor 4A-1                     | 6463817                      | 78329209                             | 12.12       | 0.005                 |
| gi15226212                           | 19.83    | 3          | 41.6     | 9.94     | 31.96  | 60S ribosomal protein L7-2                               | 9171521                      | 27849796                             | 3.04        | 0.033                 |
| gi30691619                           | 23.13    | 4          | 41.6     | 4.56     | 26.64  | elongation factor 1B beta                                | -                            | 12710359                             | -           | unique in <i>mpk6</i> |
| gi15231024                           | 41.6     | 1          | 59.2     | 6.3      | 41.833 | T-complex protein 1 subunit alpha                        | -                            | 6989583                              | -           | unique in <i>mpk6</i> |
| <b>Protein degradation</b>           |          |            |          |          |        |                                                          |                              |                                      |             |                       |
| gi15230005                           | 28.67    | 2          | 47.5     | 5.3      | 24.69  | regulatory particle triple-A ATPase 5A                   | -                            | 8410216                              | -           | unique in <i>mpk6</i> |
| <b>Cytoskeletal proteins</b>         |          |            |          |          |        |                                                          |                              |                                      |             |                       |
| gi15241179                           | 19.78    | 11         | 49.6     | 5.1      | 93.14  | tubulin alpha-5                                          | 27700598                     | 80220285                             | 2.9         | 0.053                 |

|                             |       |    |      |      |        |                                                                     |           |           |      |                       |
|-----------------------------|-------|----|------|------|--------|---------------------------------------------------------------------|-----------|-----------|------|-----------------------|
| gi15242516                  | 36.34 | 16 | 41.7 | 5.49 | 127.72 | actin 7                                                             | 23306738  | 135297066 | 5.81 | 0.048                 |
| gi30697298                  | 39.52 | 8  | 41.6 | 5.19 | 47.96  | actin depolymerizing factor 3                                       | 13497389  | 38089510  | 2.82 | 0.031                 |
| gi30683070                  | 28.57 | 13 | 47.2 | 8.9  | 103.84 | tubulin alpha-6 chain                                               | 22867734  | 114613659 | 5.01 | 0.022                 |
| gi15222075                  | 23.62 | 12 | 41.8 | 5.58 | 106.86 | actin 8                                                             | -         | 114837357 | -    | unique in <i>mpk6</i> |
| gi15227503                  | 43.07 | 3  | 42.1 | 5.33 | 46.37  | Actin-like ATPase superfamily protein                               | -         | 26913061  | -    | unique in <i>mpk6</i> |
| <b>Metabolism</b>           |       |    |      |      |        |                                                                     |           |           |      |                       |
| gi15222848                  | 52.96 | 54 | 36.9 | 7.18 | 373.32 | glyceraldehyde 3-phosphate dehydrogenase                            | 262612712 | 595627944 | 2.27 | 0.018                 |
| gi15229522                  | 35.05 | 18 | 53.1 | 5.74 | 180.69 | adenosylhomocysteinase 2                                            | 72720355  | 115940281 | 1.56 | 0.037                 |
| gi15236375                  | 41.78 | 20 | 51.7 | 7.23 | 116.93 | serine hydroxymethyltransferase 4                                   | 49262480  | 177373784 | 3.61 | 0.007                 |
| gi186505986                 | 25.38 | 4  | 42.5 | 6.18 | 60.44  | S-adenosylmethionine synthase 3                                     | 7853307   | 50065528  | 6.36 | 0.002                 |
| gi334186086                 | 23.62 | 9  | 63.8 | 6.8  | 61.95  | ketol-acid reductoisomerase                                         | 9186766   | 31621802  | 3.44 | 0.005                 |
| gi26557005                  | 25.44 | 23 | 54.9 | 6.23 | 175.1  | ATPase subunit 1                                                    | 81707979  | 154980113 | 1.9  | 0.05                  |
| gi15231059                  | 24.53 | 1  | 47.5 | 8.32 | 18.32  | acyl-coenzyme A oxidase 4                                           | -         | 3900946   | -    | unique in <i>mpk6</i> |
| gi145332819                 | 46.5  | 3  | 51.9 | 6.7  | 30.92  | pyruvate kinase                                                     | -         | 8527319   | -    | unique in <i>mpk6</i> |
| <b>Lipid metabolism</b>     |       |    |      |      |        |                                                                     |           |           |      |                       |
| gi15232671                  | 35.09 | 2  | 91.8 | 5.87 | 56.92  | phospholipase D alpha 1                                             | -         | 5325577   | -    | unique in <i>mpk6</i> |
| gi15221970                  | 27.39 | 1  | 98   | 5.52 | 41.69  | lipoxygenase 1                                                      | -         | 5459943   | -    | unique in <i>mpk6</i> |
| <b>Cell division</b>        |       |    |      |      |        |                                                                     |           |           |      |                       |
| gi15232776                  | 41.7  | 11 | 89.3 | 5.25 | 70.08  | cell division control protein 48-A                                  | -         | 40140792  | -    | unique in <i>mpk6</i> |
| <b>Aminoacid metabolism</b> |       |    |      |      |        |                                                                     |           |           |      |                       |
| gi15233111                  | 46.08 | 3  | 39.9 | 8.54 | 41.28  | cysteine synthase C1                                                | -         | 11878185  | -    | unique in <i>mpk6</i> |
| <b>Signalling</b>           |       |    |      |      |        |                                                                     |           |           |      |                       |
| gi18396845                  | 44.16 | 2  | 41.7 | 4.81 | 41.863 | 14-3-3 family protein                                               | -         | 10738972  | -    | unique in <i>mpk6</i> |
| gi15220941                  | 35.85 | 1  | 35.7 | 7.71 | 35.27  | WD-40 repeat ArcA-like protein (Rack1A)                             | -         | 8125602   | -    | unique in <i>mpk6</i> |
| <b>Protein transport</b>    |       |    |      |      |        |                                                                     |           |           |      |                       |
| gi18391349                  | 16.35 | 3  | 41.8 | 4.15 | 32.082 | vacuolar calcium-binding protein-like protein                       | -         | 9683235   | -    | unique in <i>mpk6</i> |
| <b>Unknown function</b>     |       |    |      |      |        |                                                                     |           |           |      |                       |
| gi145333007                 | 31.35 | 2  | 41.6 | 4.42 | 24.38  | Nascent polypeptide-associated complex subunit alpha-like protein 4 | -         | 9187629   | -    | unique in <i>mpk6</i> |
| gi15235944                  | 17.98 | 1  | 41.8 | 8.69 | 41.771 | uncharacterized protein                                             | -         | 32134464  | -    | unique in <i>mpk6</i> |

**Table S3.** Classification of proteins according changes in their abundances in the *mpk4* and *mpk6* mutants, as compared to the Col-0 wild type.

| category                                                      | <i>mpk4</i> mutant | <i>mpk6</i> mutant |
|---------------------------------------------------------------|--------------------|--------------------|
| total number of proteins with significantly changed abundance | 65                 | 32                 |
| upregulated $\geq 5$ fold                                     | 9                  | 5                  |
| upregulated 1.5- 5 fold                                       | 22                 | 11                 |
| downregulated 1.5- 5 fold                                     | 30                 | 7                  |
| downregulated $\geq 5$ fold                                   | 4                  | 9                  |
| detected uniquely in one sample (control/mutant)              | 25/8               | 0/19               |

**Table S4.** Proteins detected as differentially abundant in both *mpk4* and *mpk6* mutants.

| Accession   | Protein name                             | fold change in <i>mpk4</i> | fold change in <i>mpk6</i> |
|-------------|------------------------------------------|----------------------------|----------------------------|
| gi145324054 | arabinogalactan protein 31               | unique in wt               | 0.64                       |
| gi15233538  | profilin 2                               | 0.25                       | 0.21                       |
| gi15239697  | histone H2A                              | 2.29                       | 0.43                       |
| gi18414298  | monodehydroascorbate reductase (NADH)    | 6.1                        | 0.26                       |
| gi334185190 | heat shock protein 70-3                  | 0.57                       | 3.15                       |
| gi145334555 | TRAF-like family protein                 | unique in <i>mpk4</i>      | 2.54                       |
| gi15222848  | glyceraldehyde 3-phosphate dehydrogenase | 2.71                       | 2.27                       |
| gi145332383 | translational initiation factor 4A-1     | 2.87                       | 12.11                      |

**Table S5.** List of differentially regulated proteins in *mpk4* mutant roots containing MAPK-specific phosphorylation site as predicted by GPS 3.0 software.

| Position                                                                                                               | Code | Kinase    | Peptide          | Score  | Cutoff |
|------------------------------------------------------------------------------------------------------------------------|------|-----------|------------------|--------|--------|
| <b>&gt;gi 145324054 ref NP_001077616.1  arabinogalactan protein 31 (unique in wild type)</b>                           |      |           |                  |        |        |
| 33                                                                                                                     | T    | CMGC/MAPK | EVNHKTQTPSLAPAP  | 43.355 | 35.046 |
| 70                                                                                                                     | S    | CMGC/MAPK | HPHPPAKSPVKPPVK  | 35.092 | 35.046 |
| 81                                                                                                                     | S    | CMGC/MAPK | PPVKAPVSPPAKPPV  | 39.59  | 35.046 |
| 113                                                                                                                    | S    | CMGC/MAPK | PPVKPPVSPPAKPPV  | 37.553 | 35.046 |
| 165                                                                                                                    | S    | CMGC/MAPK | APVKPPVSPPTKPPV  | 41.472 | 35.046 |
| 173                                                                                                                    | T    | CMGC/MAPK | PPTKPPVTPPVYPPK  | 35.063 | 35.046 |
| <b>&gt;gi 30696056 ref NP_849818.1  elongation factor EF-2-like protein LOS1 (fold change 0.08)</b>                    |      |           |                  |        |        |
| 764                                                                                                                    | T    | CMGC/MAPK | EEMQRPGTPLYNIKA  | 35.552 | 35.046 |
| 834                                                                                                                    | T    | CMGC/MAPK | KGLKEAMTPLSEFED  | 38.873 | 35.046 |
| <b>&gt;gi 145325425 ref NP_001077717.1  proteasome subunit alpha type-5-A (fold change 0.32)</b>                       |      |           |                  |        |        |
| 56                                                                                                                     | S    | CMGC/MAPK | AVEKRITSPLEPSS   | 36.624 | 35.046 |
| <b>&gt;gi 30691626 ref NP_195504.2  heat shock protein 70-1 (fold change 0.32)</b>                                     |      |           |                  |        |        |
| 669                                                                                                                    | T    | CMGC/MAPK | GTSGTEQTPEAEFEE  | 42.453 | 35.046 |
| <b>&gt;gi 334185190 ref NP_001189847.1  heat shock protein 70-3 (fold change 0.57)</b>                                 |      |           |                  |        |        |
| 403                                                                                                                    | T    | CMGC/MAPK | DLLLLDVTPLSLGLLE | 48.055 | 35.046 |
| <b>&gt;gi 15218090 ref NP_175610.1  putative mitochondrial-processing peptidase subunit alpha-1 (fold change 2.31)</b> |      |           |                  |        |        |
| 38                                                                                                                     | T    | CMGC/MAPK | VAETSSSTPAYLSWL  | 37.379 | 35.046 |
| 94                                                                                                                     | T    | CMGC/MAPK | LKIASETTPNPAASI  | 40.124 | 35.046 |
| 228                                                                                                                    | S    | CMGC/MAPK | GYSGPLASPLYAPES  | 46.132 | 35.046 |
| <b>&gt;gi 15240765 ref NP_201551.1  voltage dependent anion channel 2 (fold change 2.41)</b>                           |      |           |                  |        |        |
| 137                                                                                                                    | S    | CMGC/MAPK | DITATLGSPPVISFGA | 40.513 | 35.046 |
| <b>&gt;gi 15221019 ref NP_175802.1  GDSL esterase/lipase (fold change 5.48)</b>                                        |      |           |                  |        |        |
| 32                                                                                                                     | S    | CMGC/MAPK | ITVAGQNSPVVALFT  | 36.626 | 35.046 |
| 82                                                                                                                     | T    | CMGC/MAPK | KFSDGLITPDFLAKF  | 36.566 | 35.046 |
| 371                                                                                                                    | T    | CMGC/MAPK | REFWVPPTPATVHAS  | 39.119 | 35.046 |
| <b>&gt;gi 186513287 ref NP_001119047.1  argininosuccinate synthase (fold change 3.63)</b>                              |      |           |                  |        |        |
| 331                                                                                                                    | S    | CMGC/MAPK | ALNGKALSPATLLAE  | 47.712 | 35.046 |
| <b>&gt;gi 15232603 ref NP_187531.1  60S acidic ribosomal protein P0-2 (fold change 4.61)</b>                           |      |           |                  |        |        |
| 158                                                                                                                    | T    | CMGC/MAPK | KGTVEIITPVELIKQ  | 35.106 | 35.046 |
| 202                                                                                                                    | S    | CMGC/MAPK | YDNQSVFSPVELDLT  | 43.1   | 35.046 |
| <b>&gt;gi 15232845 ref NP_186858.1  probable mitochondrial-processing peptidase subunit beta (fold change 13.11)</b>   |      |           |                  |        |        |
| 40                                                                                                                     | S    | CMGC/MAPK | DSVPASASPTALSPP  | 37.688 | 35.046 |
| 45                                                                                                                     | S    | CMGC/MAPK | SASPTALSPPPPMLM  | 42.61  | 35.046 |
| <b>&gt;gi 15226573 ref NP_179164.1  Ferredoxin--nitrite reductase (unique in wild type)</b>                            |      |           |                  |        |        |
| 10                                                                                                                     | S    | CMGC/MAPK | SFSLTFTSPLLPSSS  | 50.472 | 35.046 |
| <b>&gt;gi 15233349 ref NP_195308.1  aconitate hydratase 1 (unique in wild type)</b>                                    |      |           |                  |        |        |
| 304                                                                                                                    | S    | CMGC/MAPK | RATIANMSPEYGATM  | 36.127 | 35.046 |
| 659                                                                                                                    | S    | CMGC/MAPK | YFKGMTMSPPGPHGV  | 42.372 | 35.046 |
| <b>&gt;gi 18400212 ref NP_566470.1  dihydrolipoamide acetyltransferase, long form protein (unique in wild type)</b>    |      |           |                  |        |        |
| 80                                                                                                                     | S    | CMGC/MAPK | TTSTKLSSPMAGPKL  | 35.217 | 35.046 |
| 120                                                                                                                    | S    | CMGC/MAPK | EIGMPSLSPMTTEGN  | 41.945 | 35.046 |
| <b>&gt;gi 22331076 ref NP_566473.2  Subtilase family protein (unique in wild type)</b>                                 |      |           |                  |        |        |
| 21                                                                                                                     | S    | CMGC/MAPK | PLLLCFFSPSSSSSD  | 37.946 | 35.046 |
| 63                                                                                                                     | S    | CMGC/MAPK | LLRSLPSSPQPATLL  | 57.857 | 35.046 |
| 85                                                                                                                     | S    | CMGC/MAPK | HGFSARLSPIQTAAL  | 45.139 | 35.046 |
| 114                                                                                                                    | T    | CMGC/MAPK | REIHTTHTPAFLGFS  | 41.702 | 35.046 |
| 484                                                                                                                    | S    | CMGC/MAPK | LGTLIGSPPSRVA    | 35.062 | 35.046 |
| 487                                                                                                                    | S    | CMGC/MAPK | LIGSPSPSRVAAFS   | 44.914 | 35.046 |
| 713                                                                                                                    | S    | CMGC/MAPK | ANVEIDVSPSKLAFS  | 37.94  | 35.046 |
| <b>&gt;gi 240254562 ref NP_565741.4  uncharacterized protein (unique in wild type)</b>                                 |      |           |                  |        |        |
| 1299                                                                                                                   | T    | CMGC/MAPK | SSSGNVTPTQTAST   | 47.724 | 35.046 |
| <b>&gt;gi 30682607 ref NP_850576.1  mRNA decapping complex VCS (unique in wild type)</b>                               |      |           |                  |        |        |
| 28                                                                                                                     | S    | CMGC/MAPK | PGISAQPSVTTQQQQ  | 40.154 | 35.046 |
| 63                                                                                                                     | S    | CMGC/MAPK | TPPLNLQSPRSNHNP  | 37.132 | 35.046 |
| 625                                                                                                                    | S    | CMGC/MAPK | TLPQLPLSPRLSSKL  | 59.13  | 35.046 |

**Table S6.** List of differentially regulated proteins in *mpk4* mutant roots containing MAPK-docking site as predicted by The Eukaryotic Linear Motif resource for Functional Sites in Proteins (<http://elm.eu.org/>).

|                                                                    | Instances<br>(Matched) | Sequence) | Cell<br>Compartment                       | Pattern                                    | Probability |
|--------------------------------------------------------------------|------------------------|-----------|-------------------------------------------|--------------------------------------------|-------------|
| <b>arabinogalactan protein 31</b>                                  | KFNRSLVAV              | 180-188   | cell wall <sup>1</sup>                    | [KR]{0,2}[KR].{0,2}[KR].{2,4}[ILVM].[ILVF] | 4.324e-03   |
|                                                                    | KKLGKSTVVV             | 285-294   |                                           |                                            |             |
|                                                                    | KLKGKSTVVV             | 286-294   |                                           |                                            |             |
| <b>elongation factor EF-2</b>                                      | KRLAKSDPMVV            | 509-519   | cytoplasm <sup>6</sup>                    | [KR]{0,2}[KR].{0,2}[KR].{2,4}[ILVM].[ILVF] | 4.32E-03    |
|                                                                    | RLAKSDPMVV             | 510-519   |                                           |                                            |             |
| <b>proteasome subunit alpha type-5-A</b>                           | KTKEGVVLAV             | 41-50     | peroxisome, cytoplasm (prediction)        | [KR]{0,2}[KR].{0,2}[KR].{2,4}[ILVM].[ILVF] | 4.32E-03    |
| <b>heat shock protein 70-1</b>                                     | KRSDNIDL               | 289-296   | cytosol <sup>7</sup>                      | [KR]{0,2}[KR].{0,2}[KR].{2,4}[ILVM].[ILVF] | 4.324e-03   |
|                                                                    | KKQLIDL                | 573-579   |                                           |                                            |             |
| <b>heat shock protein 70-3</b>                                     | RARFEELNI              | 305-313   | nucleus, cytoplasm <sup>2</sup>           | [KR]{0,2}[KR].{0,2}[KR].{2,4}[ILVM].[ILVF] | 4.324e-03   |
|                                                                    | RIPKVQQLLV             | 348-357   |                                           |                                            |             |
| <b>putative mitochondrial-processing peptidase subunit alpha-1</b> | RKMKVEI                | 196-202   | mitochondria                              | [KR]{0,2}[KR].{0,2}[KR].{2,4}[ILVM].[ILVF] | 4.324e-03   |
| <b>voltage dependent anion channel 2</b>                           | KHPRFGLSLAL            | 264-274   | mitochondria plasma membrane <sup>8</sup> | [KR]{0,2}[KR].{0,2}[KR].{2,4}[ILVM].[ILVF] | 4.324e-03   |
| <b>GDSL esterase/lipase</b>                                        | KFMKIPLAI              | 88-96     | extracellular (prediction)                | [KR]{0,2}[KR].{0,2}[KR].{2,4}[ILVM].[ILVF] | 4.324e-03   |
| <b>argininosuccinate synthase</b>                                  | RGKLLKVVVL             | 93-101    | plastid <sup>9</sup>                      | [KR]{0,2}[KR].{0,2}[KR].{2,4}[ILVM].[ILVF] | 4.324e-03   |
|                                                                    | KKHNVPPVPV             | 255-263   |                                           |                                            |             |
|                                                                    | KKDMYMMSV              | 293-301   |                                           |                                            |             |
|                                                                    | KLYKGSVSV              | 393-401   |                                           |                                            |             |
| <b>60S acidic ribosomal protein P0-2</b>                           | RKGLRGDSVVL            | 44-54     | ribosome                                  | [KR]{0,2}[KR].{0,2}[KR].{2,4}[ILVM].[ILVF] | 4.324e-03   |
|                                                                    | KGLRGDSVVL             | 45-54     |                                           |                                            |             |
|                                                                    | KINKGTVEI              | 148-156   |                                           |                                            |             |
| <b>probable mitochondrial-processing peptidase subunit beta</b>    | RRSQRLFL               | 11-19     | mitochondria                              | [KR]{0,2}[KR].{0,2}[KR].{2,4}[ILVM].[ILVF] | 4.324e-03   |
|                                                                    | RINRERDVIL             | 210-219   |                                           |                                            |             |
| <b>Ferredoxin--nitrite reductase</b>                               | KPKRSVLV               | 19-26     | plastid                                   | [KR]{0,2}[KR].{0,2}[KR].{2,4}[ILVM].[ILVF] | 4.324e-03   |
|                                                                    | KIEREPMKL              | 74-82     |                                           |                                            |             |
|                                                                    | KSSKDDIDVRL            | 103-113   |                                           |                                            |             |
|                                                                    | RKWNVCV                | 246-252   |                                           |                                            |             |
|                                                                    | KDGRFGFNLLV            | 274-284   |                                           |                                            |             |
|                                                                    | KRCEEAIPL              | 291-299   |                                           |                                            |             |
|                                                                    | RQKTRMMWL              | 328-336   |                                           |                                            |             |
|                                                                    | KKGVRVTELVPL           | 554-565   |                                           |                                            |             |
| KGVRVTELVPL                                                        | 555-565                |           |                                           |                                            |             |
| <b>aconitate hydratase 1</b>                                       | RIDKLPYSIRI            | 35-45     | cytosol, mitochondria <sup>10</sup>       | [KR]{0,2}[KR].{0,2}[KR].{2,4}[ILVM].[ILVF] | 4.324e-03   |
|                                                                    | KRPHDRVPL              | 378-386   |                                           |                                            |             |
|                                                                    | KKACDLGL               | 458-465   |                                           |                                            |             |
| <b>dihydrolipoamide acetyltransferase, long form protein</b>       | RRDHAVAV               | 20-27     | mitochondria <sup>11</sup>                | [KR]{0,2}[KR].{0,2}[KR].{2,4}[ILVM].[ILVF] | 4.324e-03   |
| <b>Subtilase family protein</b>                                    | RRHPSVISV              | 93-101    | extracellular (prediction)                | [KR]{0,2}[KR].{0,2}[KR].{2,4}[ILVM].[ILVF] | 4.324e-03   |
| <b>uncharacterized protein</b>                                     | KSRDIDLSF              | 1264-1272 | nucleus (prediction)                      | [KR]{0,2}[KR].{0,2}[KR].{2,4}[ILVM].[ILVF] | 4.324e-03   |
| <b>mRNA decapping complex VCS</b>                                  | RKAQPLVVL              | 352-360   | cytoplasmic foci <sup>12</sup>            | [KR]{0,2}[KR].{0,2}[KR].{2,4}[ILVM].[ILVF] | 4.324e-03   |
|                                                                    | KESKRLEVAL             | 918-927   |                                           |                                            |             |
|                                                                    | KRLEVAL                | 921-927   |                                           |                                            |             |



**Table S7.** List of differentially regulated proteins in *mpk6* mutant roots containing MAPK-specific phosphorylation site as predicted by GPS 3.0 software.

| Position                                                                                                                           | Code | Kinase    | Peptide                  | Score  | Cutoff |
|------------------------------------------------------------------------------------------------------------------------------------|------|-----------|--------------------------|--------|--------|
| <b>&gt;gi 15221156 ref NP_172664.1  pyrophosphate--fructose-6-phosphate 1-phosphotransferase subunit beta 1 (fold change 0.08)</b> |      |           |                          |        |        |
| 16                                                                                                                                 | S    | CMGC/MAPK | RDLTAVG <b>S</b> PENAPAK | 38.236 | 35.046 |
| <b>&gt;gi 145324054 ref NP_001077616.1  arabinogalactan protein 31 (fold change 0.64)</b>                                          |      |           |                          |        |        |
| 33                                                                                                                                 | T    | CMGC/MAPK | EVNHKTQ <b>T</b> PSLAPAP | 43.355 | 35.046 |
| 70                                                                                                                                 | S    | CMGC/MAPK | HPHPPAK <b>S</b> PVKPPVK | 35.092 | 35.046 |
| 81                                                                                                                                 | S    | CMGC/MAPK | PPVKAPV <b>S</b> PPAKPPV | 39.59  | 35.046 |
| 113                                                                                                                                | S    | CMGC/MAPK | PPVKPPV <b>S</b> PPAKPPV | 37.553 | 35.046 |
| 165                                                                                                                                | S    | CMGC/MAPK | APVKPPV <b>S</b> PPTKPPV | 41.472 | 35.046 |
| 173                                                                                                                                | T    | CMGC/MAPK | PPTKPPV <b>T</b> PPVYPPK | 35.063 | 35.046 |
| <b>&gt;gi 334185190 ref NP_001189847.1  heat shock protein 70-3 (fold change 3.15)</b>                                             |      |           |                          |        |        |
| 403                                                                                                                                | T    | CMGC/MAPK | DLLLLDV <b>T</b> PLSLGLE | 48.055 | 35.046 |
| <b>&gt;gi 15230005 ref NP_187204.1  regulatory particle triple-A ATPase 5A (unique in <i>mpk6</i>)</b>                             |      |           |                          |        |        |
| 3                                                                                                                                  | T    | CMGC/MAPK | ***** <b>M</b> ATPMVEDTS | 48.068 | 35.046 |
| <b>&gt;gi 334186086 ref NP_001190127.1  ketol-acid reductoisomerase (fold change 3.44)</b>                                         |      |           |                          |        |        |
| 16                                                                                                                                 | S    | CMGC/MAPK | APSLSCP <b>S</b> PSSSSKT | 40.647 | 35.046 |
| 294                                                                                                                                | S    | CMGC/MAPK | GWSVALG <b>S</b> PFTFATT | 39.499 | 35.046 |
| <b>&gt;gi 15232671 ref NP_188194.1  phospholipase D alpha 1 (unique in <i>mpk6</i>)</b>                                            |      |           |                          |        |        |
| 481                                                                                                                                | S    | CMGC/MAPK | AAAGFP <b>S</b> PEAAAEA  | 49.609 | 35.046 |
| <b>&gt;gi 15232776 ref NP_187595.1  cell division control protein 48-A (unique in <i>mpk6</i>)</b>                                 |      |           |                          |        |        |
| 3                                                                                                                                  | T    | CMGC/MAPK | ***** <b>M</b> STPAESSDS | 39.309 | 35.046 |
| <b>&gt;gi 15233111 ref NP_191703.1  cysteine synthase C1 (unique in <i>mpk6</i>)</b>                                               |      |           |                          |        |        |
| 183                                                                                                                                | T    | CMGC/MAPK | AYDLLD <b>S</b> TPDAFMCQ | 35.694 | 35.046 |

**Table S8.** List of differentially regulated proteins in *mpk6* mutant roots containing MAPK-docking site as predicted by The Eukaryotic Linear Motif resource for Functional Sites in Proteins (<http://elm.eu.org/>).

| Protein                                                                        | Instances (Matched) | Sequence) | Cell Compartment                                             | Pattern                                    | Probability |
|--------------------------------------------------------------------------------|---------------------|-----------|--------------------------------------------------------------|--------------------------------------------|-------------|
| <b>pyrophosphate--fructose-6-phosphate 1-phosphotransferase subunit beta 1</b> | KKAMVEL             | 512-518   | plastid, cytoplasm (prediction)                              | [KR]{0,2}[KR].{0,2}[KR].{2,4}[ILVM].[ILVF] | 4.324e-03   |
| <b>arabinogalactan protein 31</b>                                              | KFNRSLVAV           | 180-188   | cel wall <sup>1</sup>                                        | [KR]{0,2}[KR].{0,2}[KR].{2,4}[ILVM].[ILVF] | 4.324e-03   |
|                                                                                | KKLGKSTVVV          | 285-294   |                                                              |                                            |             |
|                                                                                | KLKGKSTVVV          | 286-294   |                                                              |                                            |             |
| <b>heat shock protein 70-3</b>                                                 | RARFEELNI           | 305-313   | nucleus, cytoplasm <sup>2</sup>                              | [KR]{0,2}[KR].{0,2}[KR].{2,4}[ILVM].[ILVF] | 4.324e-03   |
|                                                                                | RIPKVQQLLV          | 348-357   |                                                              |                                            |             |
| <b>regulatory particle triple-A ATPase 5A</b>                                  | RKGKCVVL            | 102-109   | proteasome                                                   | [KR]{0,2}[KR].{0,2}[KR].{2,4}[ILVM].[ILVF] | 4.324e-03   |
|                                                                                | KERFEKLGV           | 194-202   |                                                              |                                            |             |
| <b>ketol-acid reductoisomerase</b>                                             | KKEKVSL             | 88-94     | plastid (prediction)                                         | [KR]{0,2}[KR].{0,2}[KR].{2,4}[ILVM].[ILVF] | 4.324e-03   |
| <b>phospholipase D alpha 1</b>                                                 | RRPKPGGDVTI         | 244-254   | plasma membrane <sup>3</sup> cytoplasm, nucleus (prediction) | [KR]{0,2}[KR].{0,2}[KR].{2,4}[ILVM].[ILVF] | 4.324e-03   |
|                                                                                | RPKPGGDVTI          | 245-254   |                                                              |                                            |             |
|                                                                                | KKKASEGVRV          | 259-268   |                                                              |                                            |             |
|                                                                                | KKASEGVRV           | 260-268   |                                                              |                                            |             |
|                                                                                | KLRDLSDI            | 439-448   |                                                              |                                            |             |
|                                                                                | RRAKDFIYV           | 511-519   |                                                              |                                            |             |
|                                                                                | RAKDFIYV            | 512-519   |                                                              |                                            |             |
|                                                                                | KGEKFRVYVVV         | 561-571   |                                                              |                                            |             |
| KFRVYVVV                                                                       | 564-571             |           |                                                              |                                            |             |
| <b>cell division control protein 48-A</b>                                      | RKKSPNRLVV          | 23-32     | nucleus, cytoplasm <sup>4</sup>                              | [KR]{0,2}[KR].{0,2}[KR].{2,4}[ILVM].[ILVF] | 4.324e-03   |
|                                                                                | KKSPNRLVV           | 24-32     |                                                              |                                            |             |
|                                                                                | KVVRNLRVRL          | 90-100    |                                                              |                                            |             |
|                                                                                | RVRLGDVISV          | 97-106    |                                                              |                                            |             |
|                                                                                | RPVRKGDFL           | 148-157   |                                                              |                                            |             |
|                                                                                | RKGDFL              | 151-157   |                                                              |                                            |             |
|                                                                                | KSRAHVIV            | 339-346   |                                                              |                                            |             |
|                                                                                | RRFGRFDREIDI        | 361-372   |                                                              |                                            |             |
|                                                                                | RFGFRFDREIDI        | 362-372   |                                                              |                                            |             |
|                                                                                | RFDREIDIGV          | 365-374   |                                                              |                                            |             |
|                                                                                | KNMKLAEDVDL         | 389-399   |                                                              |                                            |             |
| REKMDVIDL                                                                      | 427-435             |           |                                                              |                                            |             |
| RPGRLDQLIYI                                                                    | 639-649             |           |                                                              |                                            |             |
| <b>cysteine synthase C1</b>                                                    | KRDASLLI            | 50-57     | plastids, cytosol, mitochondria <sup>5</sup>                 | [KR]{0,2}[KR].{0,2}[KR].{2,4}[ILVM].[ILVF] | 4.324e-03   |
|                                                                                | KSKNPVVKI           | 238-246   |                                                              |                                            |             |
|                                                                                | KGKLIVTI            | 331-338   |                                                              |                                            |             |

**Table S9.** Prediction of potential kinase responsible for phosphorylation of NAI1 (At1g52410) in *Arabidopsis thaliana* as predicted by GPS 3.0 software.

| Position | Code | Kinase       | Peptide          | Score  | Cutoff |
|----------|------|--------------|------------------|--------|--------|
| 68       | S    | CMGC/MAPK    | NMNSTSSSPSSSSSS  | 47.048 | 14.896 |
| 223      | S    | CMGC/MAPK    | SSTCSAASPLSSSSD  | 41.254 | 14.896 |
| 87       | S    | CMGC/MAPK    | SQVISFGSPDTKTNP  | 22.791 | 14.896 |
| 67       | S    | CAMK/CAMKL   | NNMNSTSSSPSSSSSS | 17.138 | 6.355  |
| 98       | S    | Other/PEK    | KTNPVETSLNFSNQV  | 14.818 | 6.12   |
| 31       | T    | Other/PEK    | DFPICGETNTNPGSE  | 13.682 | 6.12   |
| 5        | S    | CK1          | ***MDDSSFMDLMID  | 11.75  | 4.352  |
| 229      | S    | TK           | ASPLSSSSDEVSIFK  | 11.667 | 8.142  |
| 228      | S    | CMGC/CK2     | AASPLSSSSDEVSIF  | 11.467 | 7.389  |
| 4        | S    | Other/NEK    | ***MDDSSFMDLMI   | 11.321 | 4.166  |
| 58       | T    | CAMK/CAMKL   | RPTKQMKTNNNMNST  | 11.304 | 6.355  |
| 213      | S    | CK1/CK1      | VYLDDSSSYSSTCS   | 11.015 | 4.847  |
| 84       | S    | Other/WEE    | SRTSQVISFGSPDTK  | 11     | 3.917  |
| 227      | S    | CMGC/CK2     | SAASPLSSSSDEVSI  | 10.945 | 7.389  |
| 92       | T    | Other/PEK    | FGSPDTKTNPVETSL  | 10.364 | 6.12   |
| 79       | T    | Other/Haspin | SSSSGSRTSQVISFG  | 10     | 7      |

**Table S10.** Examination of the presence of MAPK docking site in the amino acid sequence of NAI1 (At1g52410) as predicted by Eukaryotic Linear Motif (ELM) resource (<http://elm.eu.org/index.html>).

| Elm Name   | Instances<br>(Matched<br>Sequence) | Positions      | Cell Compartment | Pattern                                        | Probability |
|------------|------------------------------------|----------------|------------------|------------------------------------------------|-------------|
| DOC_MAPK_1 | RKDFGQILI                          | 596-604<br>[A] | nucleus, cytosol | [KR]{0,2}[KR].{0,2}[KR].{2,4}[ILVM<br>].[ILVF] | 4.32E-03    |

## Supplementary References

1. Liu, C. & Mehdy, M. C. A nonclassical arabinogalactan protein gene highly expressed in vascular tissues, AGP31, is transcriptionally repressed by methyl jasmonic acid in *Arabidopsis*. *Plant Physiol.* **145**, 863–874 (2007).
2. Dufresne, P. J. *et al.* Heat shock 70 protein interaction with Turnip mosaic virus RNA-dependent RNA polymerase within virus-induced membrane vesicles. *Virology* **374**, 217–227 (2008).
3. Gookin, T. E. & Assmann, S. M. Significant reduction of BiFC non-specific assembly facilitates in planta assessment of heterotrimeric G-protein interactors. *Plant J.* **80**, 553–567 (2014).
4. Park, S., Rancour, D. M. & Bednarek, S. Y. In planta analysis of the cell cycle-dependent localization of AtCDC48A and its critical roles in cell division, expansion, and differentiation. *Plant Physiol.* **148**, 246–258 (2008).
5. Heeg, C. *et al.* Analysis of the *Arabidopsis* O-acetylserine(thiol)lyase gene family demonstrates compartment-specific differences in the regulation of cysteine synthesis. *Plant Cell* **20**, 168–185 (2008).
6. Guo, Y., Xiong, L., Ishitani, M. & Zhu, J.-K. An *Arabidopsis* mutation in translation elongation factor 2 causes superinduction of CBF/DREB1 transcription factor genes but blocks the induction of their downstream targets under low temperatures. *Proc. Natl. Acad. Sci. U. S. A.* **99**, 7786–7791 (2002).
7. Sung, D. Y., Vierling, E. & Guy, C. L. Comprehensive Expression Profile Analysis of the *Arabidopsis* Hsp70 Gene Family. *Plant Physiol.* **126**, 789–800 (2001).
8. Robert, N. *et al.* Voltage-dependent-anion-channels (VDACs) in *Arabidopsis* have a dual localization in the cell but show a distinct role in mitochondria. *Plant Mol. Biol.* **78**, 431–446 (2012).
9. Winter, G., Todd, C. D., Trovato, M., Forlani, G. & Funck, D. Physiological implications of arginine metabolism in plants. *Front. Plant Sci.* **6**, 534 (2015).
10. Hooks, M. A. *et al.* Selective induction and subcellular distribution of ACONITASE 3 reveal the importance of cytosolic citrate metabolism during lipid mobilization in *Arabidopsis*. *Biochem. J.* **463**, 309–317 (2014).
11. Taylor, N. L., Heazlewood, J. L., Day, D. A. & Millar, A. H. Lipoic acid-dependent oxidative catabolism of alpha-keto acids in mitochondria provides evidence for branched-chain amino acid catabolism in *Arabidopsis*. *Plant Physiol.* **134**, 838–848 (2004).
12. Xu, J., Yang, J.-Y., Niu, Q.-W. & Chua, N.-H. *Arabidopsis* DCP2, DCP1, and VARICOSE Form a Decapping Complex Required for Postembryonic Development. *Plant Cell* **18**, 3386–3398 (2006).
